# Supplementary material for: A synthetic receptor platform enables rapid and portable monitoring of liver dysfunction via engineered bacteria.
Source: Research Square preprint supplement (doi:10.21203/rs.3.rs-358332/v1), 2021-03-31
Supplement: Supplementary file 29 [file 20200804_titration curve_37 degree_GCDCA_standard_Changing OD_and time 45 mins_0-40.xlsx]

## Sheet: Plate 2 - Sheet1
Software Version	3.03.14
Experiment File Path:	C:\Users\synergy\Documents\Hung Ju\Titration curve\20200804_titration curve-standard_2_OD and time change_60 mins_0-40_.xpt
Protocol File Path:	C:\Users\Public\Documents\Protocols\HungJu\CRPG_A580_scan.prt
Plate Number	Plate 2
Date	2020-08-04
Time	17:04:54
Reader Type:	Synergy H1
Reader Serial Number:	18032017
Reading Type	Reader
Procedure Details
Plate Type	96 WELL PLATE
Well Selection	Runtime
Eject plate on completion
Shake	Double Orbital: 0:10 (MM:SS)
	Frequency: 282 cpm (3 mm)
Read	Absorbance Endpoint
	Full Plate
	Wavelengths: 580
	Read Speed: Normal, Delay: 100 msec, Measurements/Data Point: 8
Results
Actual Temperature:	24.8
		1	2	3	4	5	6	7	8	9	10	11	12
	A	0.124	0.128	0.122	0.174	0.188	0.175	0.329	0.337	0.32	0.513	0.54	0.51	580
	B	0.154	0.156	0.15	0.236	0.244	0.208	0.41	0.422	0.432	0.566	0.593	0.542	580
	C	0.178	0.186	0.177	0.277	0.281	0.271	0.5	0.471	0.473	0.579	0.584	0.712	580
	D	0.238	0.235	0.236	0.359	0.374	0.324	0.599	0.517	0.655	0.746	0.78	0.698	580
	E	0.414	0.442	0.452	0.597	0.664	0.671	0.915	0.893	0.968	1.083	0.996	1.238	580
	F	0.734	0.762	0.751	0.999	1.133	1.121	1.544	1.438	1.756	1.681	1.699	1.982	580
	G	1.094	1.055	1.077	1.502	1.56	1.478	1.947	1.992	2.373	2.22	2.555	2.331	580
	H	1.243	1.208	1.213	1.747	1.79	1.756	2.469	2.493	2.67	2.858	2.834	3.047	580

## Sheet: Feuil1
			0.124	0.128	0.122	0.174	0.188	0.175	0.329	0.337	0.32	0.513	0.54	0.51
			0.154	0.156	0.15	0.236	0.244	0.208	0.41	0.422	0.432	0.566	0.593	0.542
			0.178	0.186	0.177	0.277	0.281	0.271	0.5	0.471	0.473	0.579	0.584	0.712
			0.238	0.235	0.236	0.359	0.374	0.324	0.599	0.517	0.655	0.746	0.78	0.698
			0.414	0.442	0.452	0.597	0.664	0.671	0.915	0.893	0.968	1.083	0.996	1.238
			0.734	0.762	0.751	0.999	1.133	1.121	1.544	1.438	1.756	1.681	1.699	1.982
			1.094	1.055	1.077	1.502	1.56	1.478	1.947	1.992	2.373	2.22	2.555	2.331
			1.243	1.208	1.213	1.747	1.79	1.756	2.469	2.493	2.67	2.858	2.834	3.047
			0.124667	0.00305505		0.179	0.00781025		0.328667	0.0085049		0.521	0.0165227
			0.153333	0.00305505		0.229333	0.0189033		0.421333	0.0110151		0.567	0.0255147
			0.180333	0.00493288		0.276333	0.00503322		0.481333	0.0161967		0.625	0.0753857
			0.236333	0.00152753		0.352333	0.025658		0.590333	0.069407		0.741333	0.0411987
			0.436	0.0196977		0.644	0.0408534		0.925333	0.038553		1.10567	0.122582
			0.749	0.0141067		1.08433	0.074144		1.57933	0.161918		1.78733	0.168826
			1.07533	0.0195533		1.51333	0.0421584		2.104	0.234045		2.36867	0.170647
			1.22133	0.0189297		1.76433	0.0226789		2.544	0.109777		2.913	0.116666
