# Supplementary material for: A synthetic receptor platform enables rapid and portable monitoring of liver dysfunction via engineered bacteria.
Source: Research Square preprint supplement (doi:10.21203/rs.3.rs-358332/v1), 2021-03-31
Supplement: Supplementary file 34 [file 20200728_titration curve_37 degree_GCDCA_standard_Changing OD_20 mins_20-140.xlsx]

## Sheet: Plate 3 - Sheet1
Software Version	3.03.14
Experiment File Path:	C:\Users\synergy\Documents\Hung Ju\Titration curve\20200728_titration curve-standard_2_OD and time change_5 mins_20-140.xpt
Protocol File Path:	C:\Users\Public\Documents\Protocols\HungJu\CRPG_A580_scan.prt
Plate Number	Plate 3
Date	2020-07-28
Time	16:47:38
Reader Type:	Synergy H1
Reader Serial Number:	18032017
Reading Type	Reader
Procedure Details
Plate Type	96 WELL PLATE
Well Selection	Runtime
Eject plate on completion
Shake	Double Orbital: 0:10 (MM:SS)
	Frequency: 282 cpm (3 mm)
Read	Absorbance Endpoint
	Full Plate
	Wavelengths: 580
	Read Speed: Normal, Delay: 100 msec, Measurements/Data Point: 8
Results
Actual Temperature:	25.2
		1	2	3	4	5	6	7	8	9	10	11	12
	A	0.106	0.102	0.113	0.144	0.161	0.218	0.255	0.261	0.279	0.451	0.471	0.437	580
	B	0.286	0.252	0.271	0.405	0.315	0.432	0.564	0.531	0.574	0.799	0.901	0.854	580
	C	0.401	0.371	0.42	0.743	0.721	0.707	0.838	0.814	0.802	1.13	1.127	1.025	580
	D	0.404	0.424	0.484	0.817	0.815	0.737	1.011	1.015	0.976	1.428	1.428	1.49	580
	E	0.427	0.429	0.458	0.871	0.849	0.857	1.17	1.169	1.152	1.63	1.717	1.701	580
	F	0.471	0.439	0.479	0.879	0.869	0.864	1.111	1.137	1.18	1.718	1.84	1.834	580
	G	0.421	0.449	0.472	0.916	0.889	0.892	1.226	1.181	1.169	1.833	1.8	1.937	580
	H	0.46	0.471	0.487	0.992	0.911	0.886	1.213	1.289	1.194	1.948	1.828	1.932	580

## Sheet: Feuil1
			0.106	0.102	0.113	0.144	0.161	0.218	0.255	0.261	0.279	0.451	0.471	0.437
			0.286	0.252	0.271	0.405	0.315	0.432	0.564	0.531	0.574	0.799	0.901	0.854
			0.401	0.371	0.42	0.743	0.721	0.707	0.838	0.814	0.802	1.13	1.127	1.025
			0.404	0.424	0.484	0.817	0.815	0.737	1.011	1.015	0.976	1.428	1.428	1.49
			0.427	0.429	0.458	0.871	0.849	0.857	1.17	1.169	1.152	1.63	1.717	1.701
			0.471	0.439	0.479	0.879	0.869	0.864	1.111	1.137	1.18	1.718	1.84	1.834
			0.421	0.449	0.472	0.916	0.889	0.892	1.226	1.181	1.169	1.833	1.8	1.937
			0.46	0.471	0.487	0.992	0.911	0.886	1.213	1.289	1.194	1.948	1.828	1.932
		0	0.107	0.00556776		0.174333	0.0387599		0.265	0.01249		0.453	0.017088
		20	0.269667	0.0170392		0.384	0.0612617		0.556333	0.0225019		0.851333	0.0510523
		40	0.397333	0.0247049		0.723667	0.0181475		0.818	0.0183303		1.094	0.0597746
		60	0.437333	0.0416333		0.789667	0.0456216		1.00067	0.0214554		1.44867	0.0357957
		80	0.438	0.0173494		0.859	0.0111355		1.16367	0.010116		1.68267	0.0463069
		100	0.463	0.021166		0.870667	0.00763763		1.14267	0.0348473		1.79733	0.0687701
		120	0.447333	0.0255408		0.899	0.0147986		1.192	0.03005		1.85667	0.0715006
		140	0.472667	0.0135769		0.929667	0.0554106		1.232	0.0502693		1.90267	0.0651562
